# Supplementary material for: Morphology-dependent performance of Zn2GeO4 as a high-performance anode material for rechargeable lithium ion batteries
Source: Royal Society of Chemistry journal article supplement (doi:10.1039/c5ta03665h), 2015-01-01
Supplement: c5ta03665h1.pdf [file c5ta03665h1.pdf]

## Electronic Supplementary Information

### Morphology-dependent performance of Zn<sub>2</sub>GeO<sub>4</sub> as high-performance anode material for rechargeable lithium ion battery

Yi Feng,<sup>a</sup> Xiaodan Li,<sup>b</sup> Zongping Shao<sup>c</sup> and Huanting Wang<sup>\*a</sup>

<sup>a</sup>Department of Chemical Engineering, Monash University, Clayton Victoria, 3800, Australia.

<sup>b</sup>Department of Renewable Energy, North China Electric Power University, Beijing 102206, China

<sup>c</sup>State Key Laboratory of Materials-Oriented Chemical Engineering, College of Chemistry & Chemical Engineering, Nanjing Tech University, Nanjing 211816, China

\* Corresponding author's Email: [huanting.wang@monash.edu](mailto:huanting.wang@monash.edu)

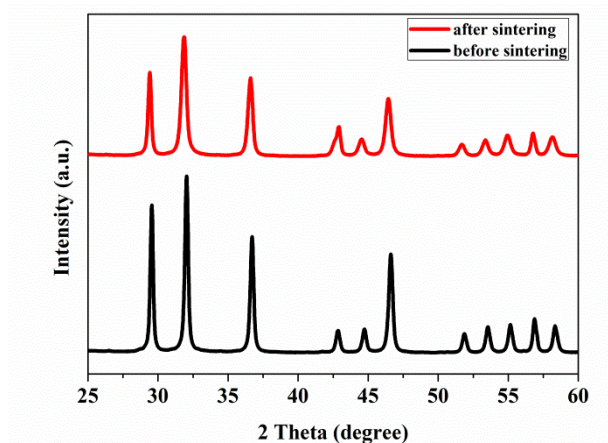

**Figure S1** XRD patterns of  $\text{Zn}_2\text{GeO}_4$  nanoparticles before and after sintering at 300 °C in Ar.

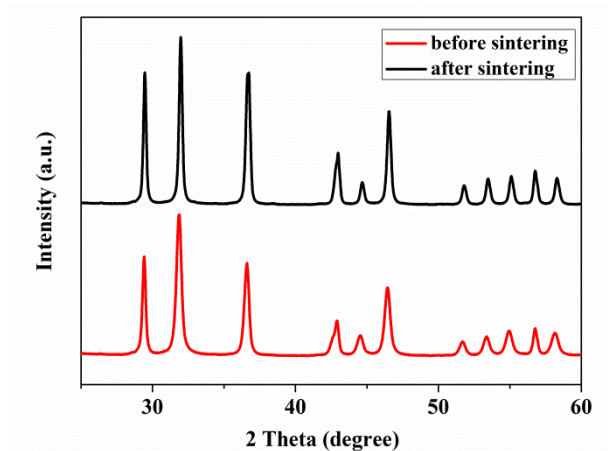

**Figure S2** XRD patterns of  $\text{Zn}_2\text{GeO}_4$  nanorods before and after sintering at 300 °C in Ar.

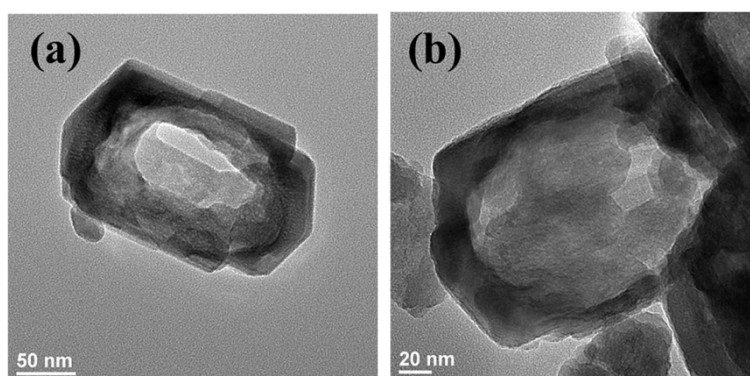

**Figure S3** TEM image of  $\text{Zn}_2\text{GeO}_4$  nanoparticles (a) before and (b) after sintering at 300 °C .
